# Supplementary material
Source: HighWire-hosted journal article supplement (https://www.annfammed.org/highwire/filestream/8206/field_highwire_adjunct_files/1/Baskerville_Suppl_Table_2.pdf)
Supplement: Baskerville_Suppl_Table_2.pdf [file Baskerville_Suppl_Table_2.pdf]

Online Supplementary Material

Baskerville NB, Liddy C, Hogg W. Systematic review and meta-analysis of practice facilitation within primary care settings. *Ann Fam Med*. 2011;10(1):0-0.

<http://www.annfammed.org/content/10/1/63/suppl/DC1>

| Supplemental Table 2. Intervention Characteristics of Studies With High Methodological Performance Scores (N = 23) |         |          |                                            |              |              |                              |                         |                                                     |           |                        |        |                                          |
|--------------------------------------------------------------------------------------------------------------------|---------|----------|--------------------------------------------|--------------|--------------|------------------------------|-------------------------|-----------------------------------------------------|-----------|------------------------|--------|------------------------------------------|
| Author, Year                                                                                                       | Country | EBG      | Target Behavior                            | Outcomes No. | Duration, Mo | Facilitator Qualifications   | Intervention Components | Tools                                               | Fac: Prac | Intensity <sup>a</sup> | Tailor | Effect Size SMD (SE) 95% CI              |
| Kottke et al <sup>1</sup> 1992                                                                                     | US      | Smoking  | Identify and advise smokers                | 2            | 18           | RN-14 h                      | AF + CG + M             | Doctors Helping Smokers-office systems, edu         | 2:11      | 30 @ 1                 | Y      | 1.01 (0.52)<br>0.00 to 2.02 <sup>c</sup> |
| McBride et al <sup>2</sup> 2000                                                                                    | US      | CVD      | Screen/manage/monitor CVD                  | 4            | 12           | RN or dietician + NR         | AF+ CG+ M               | HEART Kit-edu, office tools, guides                 | NR        | 5 @ 1                  | Y      | 0.82 (0.46)<br>-0.08 to 1.72             |
| Stange et al <sup>3</sup> 2003                                                                                     | US      | Prev     | Screen/habits/vaccine                      | 35           | 12           | RN + qualitative             | AF + CG + M             | Prevention screening                                | 1:20      | 4 @ 1.5                | Y      | 0.59 (0.23)<br>0.13 to 1.05 <sup>c</sup> |
| Lobo et al <sup>4</sup> 2004                                                                                       | NL      | CVD      | ↑ Care for high-risk CVD patients          | 16           | 21           | O-practice assistant + 80 h  | AF + CG                 | Edu, practice management focus                      | 5         | 15 @ 1                 | Y      | 0.44 (0.18)<br>0.09 to 0.79 <sup>c</sup> |
| Roetzheim et al <sup>5</sup> 2005                                                                                  | US      | Prev-Ca  | ↑ Pap/mammogram/FOBT                       | 3            | 24           | O-research staff + NR        | AF + CG                 | Cancer-screening office systems (non-IT)            | 1:4       | 4 @ 1                  | N      | 0.84 (0.29)<br>0.27 to 1.41 <sup>c</sup> |
| Hogg et al <sup>6</sup> 2008                                                                                       | Can     | Prev     | ↑ Prevention multi                         | 26           | 12           | RN + masters + 7 wk training | AF + CG                 | Rem, edu, flow                                      | 1:11      | 12 @ 1.5               | Y      | 0.73 (0.29)<br>0.16 to 1.30 <sup>c</sup> |
| Aspy et al <sup>7</sup> 2008                                                                                       | US      | Prev     | Smoking/alcohol use/diet/inactivity        | 4            | 18           | PEA-masters in health        | AF + CG + M             | Screening and intervention office systems           | 1:3       | 3 @ 6                  | Y      | 1.12 (0.36)<br>0.42 to 1.82 <sup>c</sup> |
| Jaén et al <sup>8</sup> 2010                                                                                       | US      | Prev-CIC | ↑ Prevention & chronic care                | 11           | 26           | Diverse-O + 3-mo training    | AF + CG + M             | Change management, office systems, ED, IT, Web, CQI | 1:6       | 4.5 @ 6                | Y      | 0.04 (0.37)<br>-0.69 to 0.77             |
| Cockburn et al <sup>9</sup> 1992                                                                                   | Aus     | Smoking  | Use of smoking intervention kit            | 2            | 2            | RN or O + training           | Information only        | Edu, contract card, risk factor screening           | 1:40      | 2 @ 0.25               | N      | 0.24 (0.15)<br>-0.06 to 0.54             |
| Modell et al <sup>10</sup> 1998                                                                                    | UK      | Prev     | ↑ Carrier screening for hemoglobinopathies | 1            | 12           | RN + training                | AF + M                  | Rem, edu                                            | 1:13      | 3 @ 1                  | N      | 0.32 (0.40)<br>-0.45 to 1.09             |
| Engels et al <sup>11</sup> 2006                                                                                    | NL      | CQI      | Implement team-based CQI                   | 7            | 5            | Practice assistants + 21 h   | AF + CG                 | CQI                                                 | NR        | 5 @ 1                  | Y      | 1.04 (0.32)<br>0.41 to 1.67 <sup>c</sup> |

**Supplemental Table 2, continued. Intervention Characteristics of Studies With High Methodological Performance Scores (N = 23)**

| Author, Year                       | Country | EBG        | Target Behavior                                        | Outcomes No. | Duration Mo | Facilitator Qualifications                               | Intervention Components | Tools                                                                | Fac: Prac | Intensity <sup>a</sup> | Tailor | Effect Size SMD (SE) 95% CI              |
|------------------------------------|---------|------------|--------------------------------------------------------|--------------|-------------|----------------------------------------------------------|-------------------------|----------------------------------------------------------------------|-----------|------------------------|--------|------------------------------------------|
| Aspy et al <sup>12</sup> 2008      | US      | Prev-Ca    | ↑ Mammograms                                           | 1            | 9           | PEA masters in health                                    | AF + CG                 | PDSA + practice redesign, flow                                       | 1:4-8     | 18 @ 6                 | Y      | 1.31 (0.57)<br>0.20 to 2.42 <sup>c</sup> |
| Lobo et al <sup>13</sup> 2002      | NL      | CVD        | Improved practice organization for preventive CVD care | 16           | 21          | Practice assistants + 80 h                               | AF + CG                 | Rem + edu + flow + risk profiling                                    | 1:20      | 15 @ 1                 | Y      | 0.66 (0.19)<br>0.30 to 1.02 <sup>c</sup> |
| Deitrich et al <sup>14</sup> 1992  | US      | Prev-Ca    | Mammography/FOBT /smoking cessation/ ↓dietary fat      | 10           | 3           | NR                                                       | AF + CG + M             | Rem + edu + flow                                                     | 1:8       | 3 @ 1                  | Y      | 0.59 (0.29)<br>0.02 to 1.16 <sup>c</sup> |
| Bryce et al <sup>15</sup> 1995     | UK      | Lung       | Asthma care                                            | 4            | 12          | NR                                                       | AF                      | Rem + edu                                                            | 1:12      | 1 @ 15                 | N      | 0.62 (0.32)<br>0.00 to 1.24              |
| Kinsinger et al <sup>16</sup> 1998 | US      | Prev-Ca    | ↑Breast cancer screening                               | 5            | 12          | NR                                                       | AF + CG                 | Rem + edu + flow                                                     | 1:13      | 10 @ .75               | Y      | 0.47 (0.27)<br>−0.05 to −0.99            |
| Solberg et al <sup>17</sup> 1998   | US      | Prev       | Adoption of office systems for prevention              | 10           | 22          | RN + CQI experience                                      | AF + CG + M             | CQI methods                                                          | 1:11      | 4 @ 3                  | Y      | 1.08 (0.32)<br>0.45 to 1.71 <sup>c</sup> |
| Lemelin et al <sup>18</sup> 2001   | Can     | Prev       | Multiple prevention-cancer/BP/glucose/STD              | 13           | 18          | RN-masters + training                                    | AF + CG + M             | Rem + edu + flow                                                     | 1:8       | 33 @ 1.75              | Y      | 0.98 (0.32)<br>0.36 to 1.60 <sup>c</sup> |
| Frijling et al <sup>19</sup> 2002  | NL      | Diab       | Improving process of diabetes care                     | 7            | 21          | Practice assistants + 80 h (includes 8 h diabetes focus) | AF + CG                 | Practice-level organization + diabetes-specific guidelines           | 1:20      | 15 @ 1                 | N      | 0.26 (0.18)<br>−0.09 to 0.61             |
| Frijling et al <sup>20</sup> 2003  | NL      | CVD        | Improving CVD care guidelines                          | 12           | 21          | Practice assistants + 80 h                               | AF + CG                 | Practice-level + CVD guidelines                                      | 1:20      | 15 @ 1                 | Y      | 0.39 (0.18)<br>0.05 to 0.74 <sup>c</sup> |
| Margolis et al <sup>21</sup> 2004  | US      | Prev-Child | ↑Screening TB, lead, anemia & vaccination              | 4            | 24          | RN                                                       | AF + CG + M             | Rem + flow + PDSA                                                    | 1:11      | 9 @ 1                  | Y      | 0.60 (0.30)<br>0.00 to 1.20 <sup>c</sup> |
| Mold et al <sup>22</sup> 2008      | US      | Prev       | Adoption of office systems for prevention              | 6            | 6           | PEA-masters in health                                    | AF + CG + M             | IT-preventive services reminder system, edu, reminders, group visits | 1:8       | 18 @ 4                 | Y      | 0.94 (0.53)<br>−0.10 to 1.98             |
| Hogg et al <sup>23</sup> 2008      | Can     | Prev       | ↑Prevention multi                                      | 53           | 12          | RN-masters + 7 wk                                        | AF + CG                 | Rem + edu + flow                                                     | 1:14      | 9 @ .75                | Y      | 0.11 (0.27)<br>−0.42 to 0.64             |

AF = audit and feedback; Aus = Australia; BP = blood pressure; CA = cancer; Can = Canada; CG = consensus building and goal setting; Child = children; CQI = continuous quality improvement—facilitated intervention; CVD = cardiovascular disease; Diab = diabetes; DUR = duration of intervention; EBG = evidence-based guideline targeted; edu = educational tools includes both practice level and patient specific; Fac: Prac = facilitator to practice ratio—if not reported in journal, author was contacted; flow = flow sheets and recalls; IT = technology focus; M = meetings, includes quality circles and learning collaboratives; N = no; NL = Netherlands; NR = not reported; O = other; PCMH = patient-centered medical home practice; PDSA = plan-do-study-act cycle; PEA = practice enhancement assistant; PM = practice management; PREV = prevention; Rem = reminder systems; RN = registered nurse; tailor = tailoring of intervention to practice; SE = standard error; SMD = standardized mean difference; STD = sexually transmitted disease; UK = United Kingdom; US = United States; Y = yes.

<sup>a</sup> Number of meetings @ hours per meeting.

<sup>c</sup> z statistic,  $P < .05$ .

## References

1. Kottke TE, Solberg LI, Brekke ML, Conn SA, Maxwell P, Brekke MJ. A controlled trial to integrate smoking cessation advice into primary care practice: Doctors Helping Smokers, Round III. *J Fam Pract.* 1992;34(6):701-708.
2. McBride P, Underbakke G, Plane MB, et al. Improving prevention systems in primary care practices: the Health Education and Research Trial (HEART). *J Fam Pract.* 2000;49(2):115-125.
3. Stange KC, Goodwin MA, Zyzanski SJ, Dietrich AJ. Sustainability of a practice-individualized preventive service delivery intervention. *Am J Prev Med.* 2003;25(4):296-300.
4. Lobo CM, Frijling BD, Hulscher ME, et al. Improving quality of organizing cardiovascular preventive care in general practice by outreach visitors: a randomized controlled trial. *Prev Med.* 2002;35(5):422-429.
5. Roetzheim RG, Christman LK, Jacobsen PB, Schroeder J, Abdulla R, Hunter S. Long-term results from a randomized controlled trial to increase cancer screening among attendees of community health centers. *Ann Fam Med.* 2005;3(2):109-114.
6. Hogg W, Lemelin J, Graham ID, et al. Improving prevention in primary care: evaluating the effectiveness of outreach facilitation. *Fam Pract.* 2008;25(1):40-48.
7. Aspy CB, Mold JW, Thompson DM, et al. Integrating screening and interventions for unhealthy behaviors into primary care practices. *Am J Prev Med.* 2008;35(5)(Suppl):S373-S380.
8. Jaén CR, Ferrer RL, Miller WL, et al. Patient outcomes at 26 months in the patient-centered medical home National Demonstration Project. *Ann Fam Med.* 2010;8(Suppl 1):S57-S67, S92.
9. Cockburn J, Ruth D, Silagy C, et al. Randomised trial of three approaches for marketing smoking cessation programmes to Australian general practitioners. *BMJ.* 1992;304(6828):691-694.
10. Modell M, Wonke B, Anionwu E, et al. A multidisciplinary approach for improving services in primary care: randomised controlled trial of screening for haemoglobin disorders. *BMJ.* 1998;317(7161):788-791.
11. Engels Y, van den Hombergh P, Mookink H, van den Hoogen H, van den Bosch W, Grol R. The effects of a team-based continuous quality improvement intervention on the management of primary care: a randomised controlled trial. *Br J Gen Pract.* 2006;56(531):781-787.
12. Aspy CB, Enright M, Halstead L, Mold JW; Oklahoma Physicians Resource/Research Network. Improving mammography screening using best practices and practice enhancement assistants: an Oklahoma Physicians Resource/Research Network (OKPRN) study. *J Am Board Fam Med.* 2008;21(4):326-333.
13. Lobo CM, Frijling BD, Hulscher ME, et al. Improving quality of organizing cardiovascular preventive care in general practice by outreach visitors: a randomized controlled trial. *Prev Med.* 2002;35(5):422-429.
14. Dietrich AJ, O'Connor GT, Keller A, Carney PA, Levy D, Whaley FS. Cancer: improving early detection and prevention. A community practice randomised trial. *BMJ.* 1992;304(6828):687-691.
15. Bryce FP, Neville RG, Crombie IK, Clark RA, McKenzie P. Controlled trial of an audit facilitator in diagnosis and treatment of childhood asthma in general practice. *BMJ.* 1995;310(6983):838-842.
16. Kinsinger LS, Harris R, Qaqish B, Strecher V, Kaluzny A. Using an office system intervention to increase breast cancer screening. *J Gen Intern Med.* 1998;13(8):507-514.
17. Dietrich AJ, O'Connor GT, Keller A, Carney PA, Levy D, Whaley FS. Cancer: improving early detection and prevention. A community practice randomised trial. *BMJ.* 1992;304(6828):687-691.
18. Lemelin J, Hogg W, Baskerville N. Evidence to action: a tailored multifaceted approach to changing family physician practice patterns and improving preventive care. *CMAJ.* 2001;164(6):757-763.
19. Frijling BD, Lobo CM, Hulscher MEJL, et al. Multifaceted support to improve clinical decision making in diabetes care: a randomized controlled trial in general practice. *Diabet Med.* 2002;19(10):836-842.
20. Frijling BD, Lobo CM, Hulscher MEJL, et al. Intensive support to improve clinical decision making in cardiovascular care: a randomised controlled trial in general practice. *Qual Saf Health Care.* 2003;12(3):181-187.
21. Margolis PA, Lannon CM, Stuart JM, Fried BJ, Keyes-Elstein L, Moore DE Jr. Practice based education to improve delivery systems for prevention in primary care: randomised trial. *BMJ.* 2004;328(7436):388-392.
22. Mold JW, Aspy CA, Nagykaldi Z; Oklahoma Physicians Resource/Research Network. Implementation of evidence-based preventive services delivery processes in primary care: an Oklahoma Physicians Resource/Research Network (OKPRN) study. *J Am Board Fam Med.* 2008;21(4):334-344.
23. Hogg W, Lemelin J, Graham ID, et al. Improving prevention in primary care: evaluating the effectiveness of outreach facilitation. *Fam Pract.* 2008;25(1):40-48.
